# Supplementary material for: Expression of leptin and leptin receptors in colorectal cancer—an immunohistochemical study
Source: PeerJ. 2019 Oct 2;7:e7624. doi: 10.7717/peerj.7624 (PMC6778430; doi:10.7717/peerj.7624)
Supplement: Data S1 [file peerj-07-7624-s001.xlsx]

## Sheet: Sheet1
Report number	Lab number	Age	Gender	Race	Tumor invasion (T)	Lynph node involvement (N)	Grade (Tissue differentiation: W,M,U)	Leptin (LEP) expression in cancer tissue	LEP expression in adjacent normal colon tissue	Leptin receptor (LEPR) expression in cancer tissue	LEPR expression in adjacent normal colon tissue
1	10951	56	male	malay	4	0	M	2+	1+	3+	1+
2	9775	66	male	malay	3	0	W	2+	1+	2+	1+
3	8779	65	female	malay	3	0	M	2+	1+	2+	1+
4	9184	63	male	malay	4	0	M	2+	1+	2+	1+
5	9624	54	female	malay	3	2	U	2+	1+	2+	1+
6	7669	64	female	malay	3	2	M	2+	1+	2+	1+
7	9274	62	female	malay	3	0	M	2+	1+	2+	1+
8	9589	60	female	malay	3	0	M	2+	1+	2+	1+
9	9102	55	female	malay	3	2	M	2+	1+	2+	1+
10	9793	67	male	malay	3	2	M	2+	1+	2+	1+
11	8571	67	female	malay	3	0	M	2+	1+	2+	1+
12	8882	67	male	chinese	4	1	W	2+	1+	2+	1+
13	8109	76	male	chinese	4	0	M	2+	1+	2+	1+
14	5372	74	male	chinese	3	1	M	2+	1+	2+	1+
15	2231	46	female	malay	2	0	M	2+	1+	2+	1+
16	2514	63	male	malay	3	0	M	2+	1+	2+	1+
17	2900	68	male	chinese	3	1	M	2+	1+	2+	1+
18	5512	31	male	malay	3	1	M	2+	1+	2+	1+
19	3011	32	female	malay	4	3	M	2+	1+	2+	1+
20	2451	60	male	malay	3	0	M	2+	1+	2+	1+
21	3969	62	male	malay	3	1	M	2+	1+	2+	1+
22	3895	81	male	chinese	3	0	M	3+	1+	2+	1+
23	3941	33	female	chinese	1	2	M	2+	1+	2+	1+
24	3610	77	male	chinese	4	1	M	2+	1+	2+	1+
25	4105	68	female	malay	2	0	M	2+	1+	2+	1+
26	10511	54	female	malay	3	0	M	3+	1+	2+	1+
27	10102	56	male	malay	3	1	M	2+	1+	2+	1+
28	O329	54	female	malay	3	0	M	2+	1+	3+	1+
29	6497	42	female	malay	3	2	M	2+	1+	2+	1+
30	6970	64	male	malay	3	1	M	2+	1+	2+	1+
31	5521	63	male	malay	3	0	M	2+	1+	2+	1+
32	6540	72	female	malay	4	2	M	2+	1+	2+	1+
33	6884	42	male	malay	3	0	M	2+	1+	2+	1+
34	9515	68	female	malay	2	0	M	2+	1+	2+	1+
35	5571	58	male	malay	3	0	M	2+	1+	2+	1+
36	5671	80	male	malay	3	2	M	2+	1+	2+	1+
37	7010	72	male	malay	4	1	M	2+	1+	2+	1+
38	5807	36	female	malay	3	2	M	2+	1+	2+	1+
39	6627	65	male	malay	3	0	M	2+	1+	2+	1+
40	11131	51	male	malay	3	2	M	2+	1+	2+	1+
41	10739	44	female	no race	3	1	M	2+	1+	2+	1+
42	11959	41	male	malay	4	1	U	2+	1+	1+	1+
43	2107	71	male	malay	3	0	M	2+	1+	2+	1+
44	11855	67	male	chinese	3	0	M	2+	1+	2+	1+
	The differenciation of the cancer tissue were coded as follows. W: Well differentiated, like normal M: Moderately differentiated U: Undifferentiated For degree of expression please see Methods section in the article.
